# Supplementary material for: Predictive regulatory models in Drosophila melanogaster by integrative inference of transcriptional networks
Source: HighWire-hosted journal article supplement (doi:10.1101/gr.127191.111), 2012-03-28
Supplement: S6_triads.xlsx [file S6_triads.xlsx]

## Sheet: SuppFig3A-allTriads
Motif Information		Unsupervised Network + miRNA regulations					Supervised Network + miRNA regulations					Rank in Supplementary Figure 3-A		Displayed in Supp Figure 3-A
Visualization	Identifier	FoldEnr	zScore	NoOrig	NoRandom	StDev	FoldEnr	zScore	NoOrig	NoRandom	StDev			Omitted from Supp Figure 3-A since no miRNA regulations exist in the motif
	111111002	45.245	40.73	87	2	2	67.892	76.95	294	4	4	1		FoldEnr Fold Enrichment of the observed number of motif instances in the original network w.r.t. random networks
	100111111	2.495	84.07	70709	28343	504	23.358	191.57	16989	727	85	No miRNAs		zScore Statistical significance of the observed number of motif instances in the original network w.r.t. random networks
	111111111	2.874	10.43	206699	71928	12926	14.95	13.96	184540	12344	12338	No miRNAs		NoOrig Number of instance the motif is observed in the original network
	111111000	1.596	66	5337527	3345115	30188	2.368	127.55	5245754	2215698	23756	No miRNAs		NoRandom Average number of instance the motif is observed in 100 random networks
	110111202	3.792	8.74	82	22	7	2.246	7.51	175	78	13	2		StDev Standard deviation of the number of motif instances observed in 100 random network
	110110222	1.953	5.91	132	68	11	1.941	8.76	206	106	11	3		Rank in Figure Ranking of the motif in the list of enriched motifs. Since for Supp Figure 3-A we only consider the motifs with at least one miRNA the ones with no miRNA are not displayed in the figure.
	110110111	2.067	21.48	23439	11340	563	1.725	36.26	34528	20012	400	No miRNAs
	110222000	1.514	7.27	1485	981	69	1.48	11.01	2396	1619	71	4
	101110022	1.661	2.22	56	34	10	1.459	2.7	119	82	14	5
	101110111	1.189	4.42	3317	2789	119	1.437	16.18	9821	6834	185	No miRNAs
	111202000	1.574	4.33	300	191	25	1.41	8.52	1297	920	44	6
	100111222	1.392	1.47	24	17	5	1.342	1.33	19	14	4	7
	101011222	1.057	0.32	1	1	0	1.332	0.6	1	1	0
	101111002	1.882	6.64	220	117	16	1.229	3.17	494	402	29
	101111202	1.213	0.37	4	3	2	1.22	0.73	14	11	3
	100111202	1.57	3.67	133	85	13	1.199	2.93	390	325	22
	111222000	1.199	0.44	6	5	2	1.199	1.04	55	46	9
	110011101	1.662	4.28	121	73	11	1.158	2.58	690	596	36
	110111111	0.721	-4.9	27853	38613	2197	1.117	4.73	42461	38018	939
	111110202	0.966	-3.84	295	305	3	1.083	1.2	40	37	3
	110011000	1.115	10.13	784356	703275	8001	1.069	13.42	2049976	1918179	9821
	100011101	1.208	15.3	23247	19238	262	1.052	7.38	67722	64388	452
	101110000	1.033	35.62	7595931	7349763	6911	1.033	37.17	11364783	11002342	9747
	111000000	1.025	46.41	134305052	131050443	70133	1.025	87.63	205366154	200284658	57988
	222000000	1.025	46.41	310057	302534	162	1.025	87.63	305207	297641	86
	220202000	1.025	46.41	6353	6199	3	1.025	87.63	6228	6074	2
	100220202	1.025	46.41	1085	1059	1	1.025	87.63	1210	1180	0
	110020202	1.025	46.41	380	371	0	1.025	87.63	370	361	0
	110220202	1.025	46.41	10	10	0	1.025	87.63	10	10	0
	111020002	1.025	46.41	877	856	0	1.025	87.63	867	846	0
	111220002	1.025	46.41	61	60	0	1.025	87.63	61	59	0
	111220202	1.025	46.41	1	1	0	1.025	87.63	1	1	0
	100110222	1.313	2.79	197	150	17	1.023	0.31	371	363	27
	111022000	1.023	4.81	486	475	2	1.023	9.97	3756	3671	9
	111002000	1.022	23.23	33552	32842	31	1.023	54.25	147473	144169	61
	100110022	1.014	4.57	6462	6370	20	1.022	7.56	10950	10711	32
	101110202	1.001	0.02	77	77	2	1.022	0.71	141	138	4
	110022000	1.021	25.42	118435	116033	95	1.021	43.69	180989	177228	86
	100110202	1.009	2.6	5700	5648	20	1.019	6.33	10685	10481	32
	112220000	1.024	12.18	1205	1177	2	1.018	2.34	1134	1114	9
	110202000	1.018	17.14	84750	83268	87	1.016	23.46	125351	123320	87
	102220000	1.018	14.74	67260	66096	79	1.015	14.14	70580	69552	73
	100111002	0.994	-1.45	4730	4759	20	1.014	5.64	12715	12538	31
	100111022	1.004	0.16	89	89	2	1.011	0.65	315	312	5
	112020000	1.02	15.51	21911	21482	28	1.008	3.44	20148	19994	45
	110110202	1.009	4.68	11968	11860	23	1.006	3.22	15275	15184	28
	100010222	0.997	-0.59	3764	3776	21	1.002	0.27	4138	4130	31
	110111222	1.676	1.84	12	7	3	1	-0.01	2	2	1
	100010111	0.99	-3.96	219016	221209	554	1	0.25	370691	370544	566
	101110002	0.962	-3.99	1898	1973	19	0.99	-1.05	3232	3265	31
	100011222	1.011	0.6	143	141	3	0.957	-0.96	132	138	6
	100011202	0.974	-3.49	2419	2485	19	0.945	-4.54	2200	2328	28
	110111000	0.927	-5.65	604922	652336	8393	0.939	-5.88	901197	959944	9990
	111110002	0.942	-21.46	2680	2846	8	0.928	-33.95	6530	7039	15
	100011111	0.735	-28.61	182700	248588	2303	0.894	-31.34	263423	294737	999
	100110111	0.795	-13.89	14269	17952	265	0.853	-9.83	23572	27621	412
	110110101	0.869	-7.22	68937	79337	1441	0.826	-32.5	141967	171914	921
	101011202	0.909	-3.27	80	88	2	0.823	-2.91	58	70	4
	101110222	1.507	0.85	4	3	2	0.822	-0.47	6	7	3
	101011002	0.94	-8.46	2054	2185	15	0.819	-11.05	1475	1801	29
	101111022	0.776	-0.52	5	6	3	0.793	-0.63	12	15	5
	100110101	0.607	-64.65	54625	89927	546	0.769	-25.57	34401	44760	405
	111011000	0.723	-69.72	9132406	12637082	50270	0.697	-132.64	12647117	18134742	41374
	110101000	0.621	-57.93	2832469	4564740	29902	0.595	-122.03	4003692	6723830	22290
	101011111	0.454	-10.22	308319	678691	36249	0.42	-13.83	360269	857631	35963
	111111202	35.887	21.95	14	0	1	0.256	-1.33	1	4	2

## Sheet: SuppFig3B-allTriads
Motif Information		onlyTR_unsup_netEASYparse					TR_logistic_0.6_netEASYparse					Rank in Supplementary Figure 3-B
Visualization	Identifier	FoldEnr	zScore	NoOrig	NoRandom	STDev	FoldEnr	zScore	NoOrig	NoRandom	STDev			Displayed in Supp Figure 3-B
	100111111	17.919	104.23	6113	341	55	23.5	238.43	16989	723	68	1		FoldEnr Fold Enrichment of the observed number of motif instances in the original network w.r.t. random networks
	111111111	2.891	10.65	206694	71496	12700	14.669	13.93	184539	12581	12348	2		zScore Statistical significance of the observed number of motif instances in the original network w.r.t. random networks
	111111000	1.594	69	5402188	3388320	29186	2.368	125.43	5245786	2215698	24157	3		NoOrig Number of instance the motif is observed in the original network
	110110111	1.989	23.72	23438	11783	491	1.725	38.3	34529	20012	379	4		NoRandom Average number of instance the motif is observed in 100 random networks
	101110111	1.349	7.52	3317	2459	114	1.439	16.55	9821	6826	181	5		StDev Standard deviation of the number of motif instances observed in 100 random network
	110011101	1.537	3.24	121	79	13	1.154	2.62	690	598	35	6		Rank in Figure Ranking of the motif in the list of enriched motifs.
	110111111	0.975	-0.54	27853	28575	1330	1.116	4.88	42460	38050	905
	110011000	1.025	2.08	789481	770049	9336	1.069	15.63	2049980	1918325	8424
	100011101	1.077	5.86	18111	16812	222	1.051	7.85	67722	64410	422
	101110000	1.026	17.61	5567704	5428884	7891	1.033	45.45	11364655	11001904	7984
	111000000	1.026	46.27	136000000	132958628	73712	1.025	82.85	205000000	200000000	61531
	100010111	0.975	-10.42	183136	187877	456	1	0.31	370701	370555	475
	110111000	1.026	1.59	613447	597786	9849	0.939	-6.68	901188	959564	8746
	100011111	0.949	-5.19	134670	141896	1392	0.894	-31.4	263432	294699	996
	100110111	0.783	-8.09	5755	7350	197	0.854	-10.27	23572	27593	392
	110110101	0.777	-22.11	68938	88706	894	0.826	-34	141966	171869	879
	100110101	0.695	-19.22	8361	12032	191	0.768	-26.37	34401	44787	394
	111011000	0.722	-73.73	9180434	12708222	47848	0.697	-131.65	12647169	18132926	41673
	110101000	0.614	-58.82	2878664	4685757	30722	0.595	-113.36	4003632	6723291	23992
	101011111	0.447	-10.46	308317	689281	36417	0.42	-13.77	360271	856817	36056
