# Supplementary material for: Predictive regulatory models in Drosophila melanogaster by integrative inference of transcriptional networks
Source: HighWire-hosted journal article supplement (doi:10.1101/gr.127191.111), 2012-03-28
Supplement: S8_ImaGO_enrichment_for_predicted_GO_terms.xlsx [file S8_ImaGO_enrichment_for_predicted_GO_terms.xlsx]

## Sheet: Sheet1
GO term/Imago term	Enrichment in True positives	Enrichment in new members
anatomical structure development VentEctEpi:11-12	3.46075	2.50311
anatomical structure development VentEct:9-10	3.19864	2.35857
anatomical structure development ProcephEct:9-10	2.65236	2.01531
anatomical structure development DorsEctEpi:11-12	3.11468	1.98367
anatomical structure development VentEct:7-8	2.92001	2.2427
anatomical structure development VentCord:13-16	1.78833	1.87625
anatomical structure development CentBrain:11-12	1.86756	1.87927
anatomical structure development VentCord:11-12	1.90482	1.86524
anatomical structure development VentEctEpi:13-16	2.44101	2.6449
anatomical structure development CentBrain:13-16	1.69495	1.82726
anatomical structure development VentCord:9-10	2.13307	2.13171
anatomical structure development Phar:13-16	2.79125	2.1973
anatomical structure development DorsEctEpi:13-16	2.14726	2.22905
anatomical structure development TrunkMeso:7-8	1.66806	1.68932
anatomical structure morphogenesis DorsEct:9-10	5.33513	2.93951
anatomical structure morphogenesis VentEctEpi:11-12	4.27922	4.46685
anatomical structure morphogenesis DorsEctEpi:11-12	3.99394	3.46481
anatomical structure morphogenesis VentEct:9-10	3.89653	3.61371
anatomical structure morphogenesis VentEct:4-6	4.18413	3.08472
anatomical structure morphogenesis FoGut:9-10	5.8353	2.65121
anatomical structure morphogenesis Phar:11-12	5.26673	4.8232
anatomical structure morphogenesis DorsEct:7-8	4.11672	3.23346
anatomical structure morphogenesis VentEct:7-8	3.20942	2.9298
anatomical structure morphogenesis VentEctEpi:13-16	2.99858	4.25504
anatomical structure morphogenesis DorsEct:4-6	3.42338	3.14278
anatomical structure morphogenesis DorsEctEpi:13-16	2.89299	3.52911
anatomical structure morphogenesis HeadEpi:13-16	3.4598	3.25391
anatomical structure morphogenesis ProcephEct:7-8	2.94635	3.3115
anatomical structure morphogenesis HeadEpi:11-12	5.31214	5.62707
anatomical structure morphogenesis ProcephEct:9-10	2.30789	3.02067
anatomical structure morphogenesis HiGut:9-10	2.8234	2.58618
anatomical structure morphogenesis ProcephEct:4-6	2.7387	4.56341
anatomical structure morphogenesis FoGut:13-16	2.50491	2.22959
anatomical structure morphogenesis VentCord:13-16	1.69338	1.84803
anatomical structure morphogenesis HiGut:7-8	3.00702	2.53218
anatomical structure morphogenesis VentCord:9-10	2.06228	2.05766
anatomical structure morphogenesis CentBrain:11-12	1.67919	1.81399
anatomical structure morphogenesis FoGut:11-12	2.39956	2.51011
anatomical structure morphogenesis Midline:13-16	3.20942	3.08937
anatomical structure morphogenesis VisualPr:7-8	4.46527	4.68922
anatomical structure morphogenesis TrunkViscMusc:11-12	3.74432	4.30822
anatomical structure morphogenesis HiGut:4-6	4.27922	5.10604
anatomical structure morphogenesis CentBrain:13-16	1.51951	1.74836
anatomical structure morphogenesis Phar:13-16	2.5444	3.87161
anatomical structure morphogenesis VentCord:11-12	1.62731	1.76371
anatomical structure morphogenesis Atrium:13-16	2.85281	2.71652
anatomical structure morphogenesis HiGut:13-16	1.66994	2.27628
anatomical structure morphogenesis TrunkViscMusc:13-16	2.72314	2.56888
anatomical structure morphogenesis Phar:7-8	4.66824	5.37129
anatomical structure morphogenesis Amnio:7-8	3.26036	4.37661
cell differentiation DorsEctEpi:11-12	4.31488	4.38584
cell differentiation DorsEct:9-10	5.50186	4.9488
cell differentiation VentEct:9-10	4.20964	4.99745
cell differentiation VentEctEpi:11-12	4.35847	6.10401
cell differentiation ProcephEct:9-10	3.30558	2.61536
cell differentiation ProcephEct:7-8	3.85831	3.35342
cell differentiation DorsEct:4-6	4.23643	3.77929
cell differentiation VentEct:4-6	4.18413	4.85085
cell differentiation HeadEpi:13-16	4.00608	3.08916
cell differentiation Phar:11-12	5.43132	6.76673
cell differentiation HeadEpi:11-12	7.30419	5.63894
cell differentiation VentEct:7-8	3.30971	4.3061
cell differentiation DorsEctEpi:13-16	3.14914	3.55938
cell differentiation DorsEct:7-8	4.17089	4.9488
cell differentiation FoGut:7-8	6.61942	6.37634
cell differentiation ProcephEct:4-6	3.53036	5.19883
cell differentiation FoGut:9-10	5.34903	4.09907
cell differentiation VentEctEpi:13-16	2.92049	4.67823
cell differentiation FoGut:13-16	3.06156	1.93639
cell differentiation VisualPr:7-8	6.13975	4.51115
cell differentiation VentCord:9-10	2.41028	2.4744
cell differentiation HiGut:4-6	5.88393	6.14018
cell differentiation VentCord:13-16	1.76203	1.90484
cell differentiation CentBrain:11-12	1.862	1.79185
cell differentiation HiGut:9-10	2.91163	3.58842
cell differentiation Phar:13-16	3.1805	3.64362
cell differentiation TrunkViscMusc:11-12	4.41295	4.44066
cell differentiation FoGut:4-6	5.34903	5.92089
cell differentiation SNS:11-12	5.11646	4.73671
cell differentiation HiGut:7-8	2.86245	4.06004
cell differentiation Midline:13-16	3.43229	3.25068
cell differentiation HiGut:13-16	1.95174	2.49927
cell differentiation CentBrain:13-16	1.59772	1.85511
cell differentiation VentCord:11-12	1.74032	1.94417
cell differentiation FoGut:11-12	2.41956	3.25068
cell differentiation VentCord:7-8	3.295	3.64362
cell differentiation SNS:13-16	5.23016	4.73671
cell differentiation Midline:11-12	3.44425	5.07505
cell differentiation Midline:4-6	4.95489	6.76673
cell differentiation HiGut:11-12	1.72861	2.88043
cellular developmental process DorsEctEpi:11-12	4.28164	4.02885
cellular developmental process DorsEct:9-10	5.2221	4.8707
cellular developmental process VentEctEpi:11-12	4.34369	6.05574
cellular developmental process DorsEct:4-6	4.24441	3.70312
cellular developmental process VentEct:9-10	3.81397	4.98987
cellular developmental process ProcephEct:9-10	3.1375	2.53595
cellular developmental process ProcephEct:7-8	3.66213	3.273
cellular developmental process Phar:11-12	5.58475	6.65994
cellular developmental process DorsEct:7-8	4.24158	4.8707
cellular developmental process VentEct:4-6	3.97137	4.98025
cellular developmental process HeadEpi:13-16	3.80238	2.83771
cellular developmental process HeadEpi:11-12	6.93279	5.17996
cellular developmental process VentEct:7-8	3.14142	4.3152
cellular developmental process DorsEctEpi:13-16	2.98902	3.52117
cellular developmental process FoGut:7-8	6.28284	5.85733
cellular developmental process Meso:4-6	4.4678	3.17272
cellular developmental process FoGut:13-16	3.0875	1.91561
cellular developmental process VentEctEpi:13-16	2.93505	4.70033
cellular developmental process FoGut:9-10	5.07704	3.76543
cellular developmental process ProcephEct:4-6	3.35085	5.04098
cellular developmental process VentCord:13-16	1.7919	1.92478
cellular developmental process Phar:13-16	3.32066	3.71894
cellular developmental process VisualPr:7-8	5.82756	4.14396
cellular developmental process TrunkViscMusc:11-12	4.88665	4.07922
cellular developmental process CentBrain:11-12	1.83802	1.78913
cellular developmental process HiGut:4-6	5.58475	5.6404
cellular developmental process VentCord:9-10	2.28773	2.273
cellular developmental process HiGut:9-10	2.76359	3.29634
cellular developmental process Midline:13-16	3.72316	3.83926
cellular developmental process CentBrain:13-16	1.63314	1.76091
cellular developmental process FoGut:11-12	2.50531	3.19938
cellular developmental process FoGut:4-6	5.07704	6.52674
cellular developmental process HiGut:13-16	1.96147	2.51449
cellular developmental process SNS:11-12	4.8563	5.80155
cellular developmental process VentCord:11-12	1.73048	2.02946
cellular developmental process HiGut:7-8	2.7169	3.72957
cellular developmental process VentCord:7-8	3.12746	3.34705
cellular developmental process SNS:13-16	4.96422	5.80155
cellular developmental process Midline:11-12	3.26912	5.43895
cellular developmental process Midline:4-6	4.70294	6.21595
cellular developmental process TrunkViscMusc:13-16	3.04622	2.83771
cellular developmental process HiGut:11-12	1.76693	2.79298
developmental process ProcephEct:7-8	2.35976	1.48222
developmental process ProcephEct:9-10	2.07225	1.55386
developmental process CentBrain:11-12	1.56586	1.41099
developmental process VentCord:13-16	1.49141	1.29235
developmental process CentBrain:13-16	1.45637	1.32261
developmental process VentCord:11-12	1.53639	1.37188
embryonic development VentEct:9-10	6.28147	5.97048
embryonic development VentEctEpi:11-12	6.31226	7.54774
embryonic development VentEct:7-8	5.68103	4.03378
embryonic development VentEct:4-6	7.06973	4.90047
embryonic development DorsEct:7-8	7.47883	6.07073
embryonic development DorsEct:9-10	7.08285	4.85659
embryonic development DorsEct:4-6	5.90828	6.05782
embryonic development Phar:11-12	7.86605	9.96096
embryonic development ProcephEct:4-6	4.99931	6.94433
embryonic development VentEctEpi:13-16	3.98087	3.51503
embryonic development ProcephEct:7-8	4.0978	3.59946
embryonic development FoGut:9-10	7.23041	4.69314
embryonic development Phar:13-16	4.91333	3.4764
embryonic development Midline:11-12	6.65097	8.71584
embryonic development VentCord:11-12	2.40044	2.42829
embryonic development DorsEctEpi:11-12	3.40862	6.02576
embryonic development ProcephEct:9-10	2.8086	3.49346
embryonic development VisualPr:7-8	7.90405	11.6211
embryonic development VentCord:13-16	1.94431	2.399
embryonic development Midline:13-16	4.7342	6.38022
embryonic development HiGut:9-10	3.27977	3.28678
embryonic development VentCord:9-10	2.46406	3.03537
embryonic development VisualPr:4-6	5.24403	12.2022
embryonic development DorsEctEpi:13-16	2.24041	2.82131
generation of precursor metabolites and energy TrunkSomMusc:13-16	5.68894	2.8206
generation of precursor metabolites and energy MalTub:13-16	7.43233	5.6697
generation of precursor metabolites and energy MidGut:13-16	2.70388	2.30419
generation of precursor metabolites and energy HiGut:13-16	3.72221	2.8206
generation of precursor metabolites and energy MalTub:11-12	3.2721	5.72755
imaginal disc development VentEctEpi:11-12	6.10185	6.42955
imaginal disc development DorsEctEpi:13-16	4.64085	4.20584
imaginal disc development Phar:11-12	8.14698	10.6066
imaginal disc development VentEctEpi:13-16	4.12304	5.13306
imaginal disc development HiGut:13-16	2.7554	3.134
imaginal disc development Phar:13-16	4.4527	4.44207
imaginal disc development VentCord:13-16	1.76203	2.78671
multicellular organismal development ProcephEct:7-8	2.927	1.71285
multicellular organismal development VentEct:9-10	2.85041	1.70994
multicellular organismal development ProcephEct:9-10	2.40737	1.84712
multicellular organismal development VentEctEpi:13-16	2.46435	1.77002
multicellular organismal development CentBrain:11-12	1.76698	1.50918
multicellular organismal development VentCord:13-16	1.63183	1.47984
multicellular organismal development CentBrain:13-16	1.59349	1.49735
multicellular organismal development DorsEctEpi:13-16	2.14896	1.74035
multicellular organismal development VentCord:11-12	1.7146	1.49791
nervous system development DorsEctEpi:11-12	4.54483	5.38971
nervous system development ProcephEct:7-8	4.47032	4.41534
nervous system development VentEctEpi:11-12	4.62899	5.57228
nervous system development HeadEpi:11-12	9.40309	9.89947
nervous system development DorsEct:4-6	4.54483	3.98085
nervous system development ProcephEct:4-6	4.54483	6.08455
nervous system development HeadEpi:13-16	4.35143	3.61546
nervous system development DorsEct:9-10	4.7219	5.58507
nervous system development VentEct:9-10	3.69498	3.81448
nervous system development DorsEct:7-8	4.60236	4.34395
nervous system development VentEct:7-8	3.55065	2.40533
nervous system development DorsEctEpi:13-16	3.20058	4.56635
nervous system development Phar:11-12	5.24403	5.09116
nervous system development ProcephEct:9-10	2.8086	3.31602
nervous system development Amnio:4-6	8.26332	6.23667
nervous system development VentEctEpi:13-16	2.98565	5.13306
nervous system development Meso:4-6	3.78736	4.33102
nervous system development Amnio:9-10	5.68103	6.92963
nervous system development Phar:13-16	3.07083	3.55366
organ development DorsEct:9-10	5.20949	2.62827
organ development DorsEctEpi:11-12	3.93967	3.05719
organ development Phar:11-12	6.06104	2.69532
organ development VentEctEpi:11-12	4.11212	4.53851
organ development VentEct:4-6	4.457	2.38682
organ development VentEct:9-10	3.72711	3.63497
organ development VentEct:7-8	3.24575	2.54682
organ development ProcephEct:7-8	3.17053	3.11671
organ development ProcephEct:4-6	3.43826	3.48967
organ development ProcephEct:9-10	2.57548	2.83587
organ development VentEctEpi:13-16	2.82339	4.07625
organ development HiGut:9-10	3.24922	2.22341
organ development DorsEctEpi:13-16	2.72397	3.30813
organ development HeadEpi:13-16	3.20051	3.44532
organ development Phar:13-16	3.29113	3.38643
organ development HeadEpi:11-12	4.94003	5.2409
organ development VentCord:13-16	1.68542	1.65236
organ development VentCord:9-10	2.07124	2.29974
organ development FoGut:11-12	2.41	2.37382
organ development CentBrain:11-12	1.63209	1.66536
organ development FoGut:13-16	2.0965	2.07658
organ development Atrium:13-16	3.06988	3.03611
organ development CentBrain:13-16	1.45879	1.66669
organ development VentCord:11-12	1.56376	1.64267
organ development TrunkViscMusc:11-12	3.13383	3.43934
organ development HiGut:11-12	1.69971	2.08219
organ development HiGut:13-16	1.60732	2.21224
organ morphogenesis DorsEct:9-10	6.22432	3.44285
organ morphogenesis DorsEctEpi:11-12	4.59303	3.79706
organ morphogenesis VentEct:9-10	4.48101	4.2325
organ morphogenesis DorsEct:7-8	5.46007	4.20793
organ morphogenesis VentEct:4-6	5.05899	3.70556
organ morphogenesis VentEctEpi:11-12	4.43771	5.54879
organ morphogenesis DorsEct:4-6	4.55309	3.81725
organ morphogenesis Phar:11-12	6.45175	6.27677
organ morphogenesis VentEct:7-8	3.74432	3.60093
organ morphogenesis DorsEctEpi:13-16	3.54392	4.00008
organ morphogenesis VentEctEpi:13-16	3.32342	5.22095
organ morphogenesis HeadEpi:13-16	3.82398	3.7888
organ morphogenesis FoGut:13-16	3.11722	2.74033
organ morphogenesis HiGut:9-10	3.45867	3.36557
organ morphogenesis HiGut:7-8	3.886	2.56301
organ morphogenesis ProcephEct:9-10	2.55792	3.30204
organ morphogenesis FoGut:11-12	3.13543	2.76403
organ morphogenesis ProcephEct:7-8	2.94635	4.08268
organ morphogenesis Midline:4-6	7.56746	5.49217
organ morphogenesis VisualPr:9-10	5.0832	4.66002
organ morphogenesis HiGut:4-6	5.99091	5.69559
organ morphogenesis VentCord:9-10	2.30975	2.67778
organ morphogenesis HiGut:13-16	2.10412	2.83348
organ morphogenesis OpLobe:11-12	5.70563	5.12603
organ morphogenesis Atrium:13-16	3.99394	3.09329
organ morphogenesis ProcephEct:4-6	2.636	5.93869
organ morphogenesis VisualPr:7-8	5.20949	7.3229
organ morphogenesis Phar:9-10	5.99091	5.91465
organ morphogenesis HeadEpi:11-12	4.13166	6.10241
organ morphogenesis Phar:7-8	6.53554	9.32005
organ morphogenesis TrunkViscMusc:11-12	3.74432	5.60659
organ morphogenesis Amnio:7-8	4.5645	5.69559
organ morphogenesis Phar:13-16	2.59066	4.81934
organ morphogenesis VentCord:13-16	1.53777	1.78655
organ morphogenesis Amnio:4-6	4.35702	6.40753
organ morphogenesis VisualPr:4-6	3.68671	6.40753
organ morphogenesis CentBrain:11-12	1.51669	1.93912
organ morphogenesis HiGut:11-12	1.76004	2.77083
oxidative phosphorylation HeadSomMusc:13-16	9.49687	5.58925
oxidative phosphorylation MidGut:13-16	3.28994	2.48143
oxidative phosphorylation MalTub:13-16	8.74184	6.54196
pattern specification process VentEct:9-10	6.66095	3.43303
pattern specification process DorsEct:4-6	6.76811	3.98085
pattern specification process VentEctEpi:11-12	6.26677	5.7866
pattern specification process DorsEct:7-8	7.21451	5.58507
pattern specification process Phar:11-12	8.90541	5.72755
pattern specification process DorsEct:9-10	6.47666	5.58507
pattern specification process VentEctEpi:13-16	4.4202	3.46481
pattern specification process DorsEctEpi:11-12	4.15586	6.06343
pattern specification process FoGut:9-10	7.28624	5.39712
pattern specification process ProcephEct:7-8	3.79575	4.96726
pattern specification process ProcephEct:9-10	3.00182	4.01748
pattern specification process ProcephEct:4-6	3.91838	6.84512
pattern specification process DorsEctEpi:13-16	3.26113	2.70376
pattern specification process HiGut:7-8	4.33236	5.34571
pattern specification process HiGut:9-10	3.67233	4.72475
pattern specification process HiGut:4-6	7.42117	10.3944
pattern specification process VentCord:13-16	1.9049	2.25724
pattern specification process PNS Chemo:13-16	3.95796	4.45476
pattern specification process Midline:13-16	4.4527	5.50294
pattern specification process HiGut:13-16	2.25893	3.2907
pattern specification process Midline:11-12	4.3441	10.0232
pattern specification process VentCord:11-12	1.88142	2.44347
pattern specification process CentBrain:11-12	1.80363	2.15411
pattern specification process FoGut:11-12	2.6633	3.66863
pattern specification process HiGut:11-12	2.01252	3.79257
regionalization VentEct:9-10	6.91319	5.04857
regionalization VentEct:4-6	7.08602	3.97803
regionalization VentEctEpi:11-12	6.29869	5.67314
regionalization DorsEct:4-6	6.37742	5.85419
regionalization VentEct:7-8	5.31452	3.63831
regionalization DorsEct:7-8	6.99633	6.57068
regionalization Phar:11-12	8.9938	6.7383
regionalization DorsEct:9-10	6.62589	6.57068
regionalization ProcephEct:4-6	4.67677	8.05308
regionalization Phar:13-16	5.17088	3.76269
regionalization DorsEctEpi:11-12	3.89731	6.11438
regionalization ProcephEct:7-8	3.83342	5.84383
regionalization HiGut:4-6	8.85753	12.2288
regionalization HiGut:7-8	4.59634	6.28908
regionalization ProcephEct:9-10	2.86626	5.40166
regionalization PNS Chemo:13-16	4.72401	5.2409
regionalization HiGut:9-10	3.50648	4.44682
regionalization HiGut:13-16	2.48875	2.7653
regionalization VentCord:13-16	1.81887	2.65557
regionalization CentBrain:11-12	1.88363	2.53425
regionalization VentCord:11-12	1.79646	2.87467
regulation of biosynthetic process VentCord:13-16	1.85728	2.22937
regulation of biosynthetic process CentBrain:13-16	1.62762	2.35209
regulation of cellular biosynthetic process VentCord:13-16	1.85728	2.22937
regulation of cellular biosynthetic process CentBrain:13-16	1.62762	2.35209
regulation of cellular metabolic process VentCord:11-12	2.08364	2.03094
regulation of cellular metabolic process VentCord:13-16	1.83395	1.82403
regulation of cellular metabolic process CentBrain:11-12	1.83008	2.01423
regulation of cellular metabolic process CentBrain:13-16	1.68551	1.77641
regulation of gene expression VentCord:13-16	1.81437	2.02403
regulation of gene expression VentCord:11-12	1.97581	2.32711
regulation of gene expression CentBrain:13-16	1.66952	1.97119
regulation of gene expression CentBrain:11-12	1.73443	2.26749
regulation of gene expression ProcephEct:9-10	1.8328	2.41653
regulation of macromolecule metabolic process VentCord:13-16	1.80965	2.26533
regulation of macromolecule metabolic process VentEct:7-8	2.69017	2.494
regulation of macromolecule metabolic process VentCord:11-12	1.96504	2.25205
regulation of macromolecule metabolic process CentBrain:13-16	1.67412	2.12739
regulation of macromolecule metabolic process CentBrain:11-12	1.76605	2.08462
regulation of macromolecule metabolic process ProcephEct:9-10	1.93451	2.40679
regulation of macromolecule metabolic process VentCord:9-10	1.93129	2.25205
regulation of metabolic process VentCord:13-16	1.80965	2.28004
regulation of metabolic process VentEct:7-8	2.69017	2.34285
regulation of metabolic process VentCord:11-12	1.96504	2.22134
regulation of metabolic process CentBrain:13-16	1.67412	2.14649
regulation of metabolic process CentBrain:11-12	1.76605	2.05154
regulation of metabolic process ProcephEct:9-10	1.93451	2.26092
regulation of primary metabolic process VentCord:11-12	2.11365	2.2848
regulation of primary metabolic process VentCord:13-16	1.84926	1.91523
regulation of primary metabolic process CentBrain:11-12	1.85832	2.23804
regulation of primary metabolic process CentBrain:13-16	1.70359	1.86523
regulation of primary metabolic process ProcephEct:9-10	1.97942	2.29571
regulation of RNA metabolic process Midline:13-16	4.66274	6.98786
regulation of RNA metabolic process VentCord:13-16	1.72879	2.38861
regulation of RNA metabolic process DorsEctEpi:13-16	1.92639	3.60501
regulation of RNA metabolic process CentBrain:13-16	1.42844	2.32625
regulation of transcription, DNA-dependent Midline:13-16	4.41295	6.98786
regulation of transcription, DNA-dependent DorsEctEpi:13-16	1.98893	3.60501
system development VentEctEpi:11-12	3.99394	3.69357
system development DorsEct:9-10	4.66824	2.37663
system development DorsEctEpi:11-12	3.69439	2.76448
system development VentEct:9-10	3.50687	2.92173
system development Phar:11-12	5.29965	2.84347
system development ProcephEct:7-8	3.43741	2.11373
system development VentEct:7-8	3.08906	2.63197
system development VentEctEpi:13-16	2.88613	3.68597
system development ProcephEct:9-10	2.55792	2.32013
system development DorsEctEpi:13-16	2.61575	3.10644
system development HeadEpi:13-16	3.05919	2.59621
system development Phar:13-16	3.23833	2.89207
system development VentCord:13-16	1.73	1.86769
system development CentBrain:11-12	1.74419	1.83329
system development HeadEpi:11-12	4.13166	4.73911
system development VentCord:11-12	1.72977	1.78247
system development CentBrain:13-16	1.56421	1.81893
system development VentCord:9-10	1.94885	2.22809
system development HiGut:13-16	1.69499	1.80038
system development VentCord:7-8	2.636	3.06219
translation HeadSomMusc:13-16	2.78059	6.52079
translation TrunkSomMusc:13-16	2.11855	3.61616
translation MidGut:13-16	1.65938	3.19041
translation TrunkMeso:11-12	1.90669	3.65287
